# Supplementary material
Source: PubMed Central journal article supplement (PMC2888642)

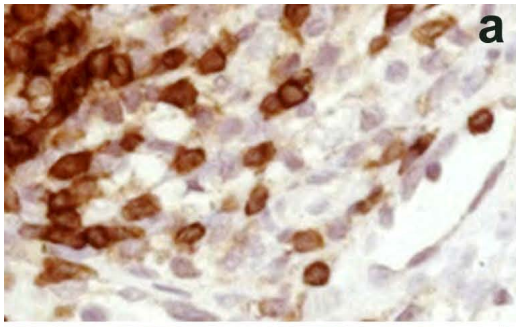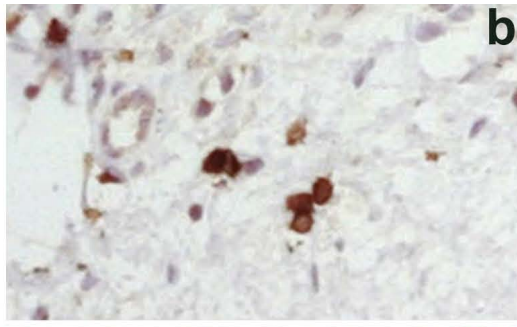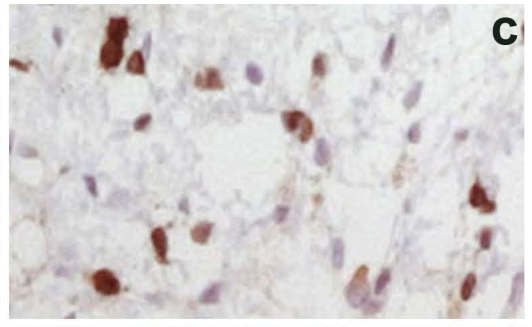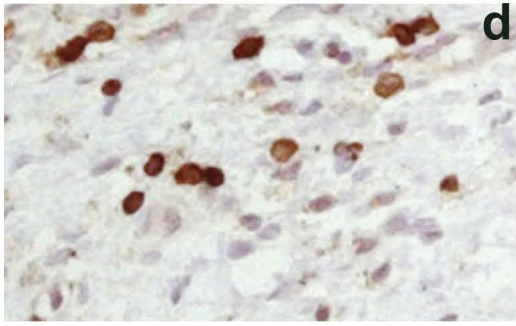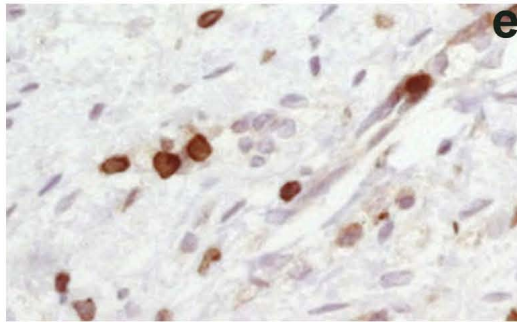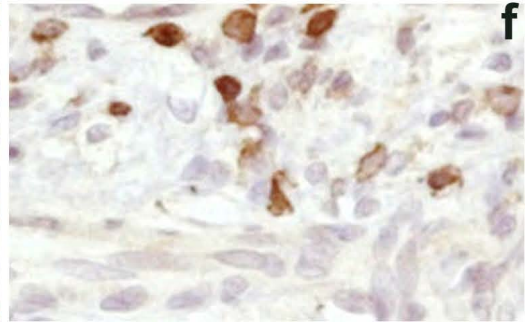

Supplement: NIHMS174149-supplement-supplemental.pdf [file NIHMS174149-supplement-supplemental.pdf]
